# Supplementary material for: Bacterial Growth in Chloride and Perchlorate Brines: Halotolerances and Salt Stress Responses of Planococcus halocryophilus
Source: PubMed Central journal article supplement — Astrobiology. 2019 Oct 24;19(11):1377–87. doi: 10.1089/ast.2019.2069 (PMC6818489; doi:10.1089/ast.2019.2069), 2019-10-24
Supplement: Supp_Data.pdf [file Supp_Data.pdf]

## Supplementary Information

### 1. *Growth curves of Planococcus halocryophilus*

- All growth curves were obtained as described in section 2 of the main text
- Cells were grown aerobically in liquid growth medium (DMSZ #92) containing salt amounts as indicated within the figure legends
- All curves obtained as biological duplicates (samples [A] and [B])
- Dashed lines indicate a 2<sup>nd</sup> run of a specific experiment
- X indicates the detection limit (no detectable CFU within 100  $\mu$ l sample)
- Negative error bars reaching values of  $y \leq 0$  CFU/ml were removed.
- IM – Inoculation method as described in section 2.2 of the main text

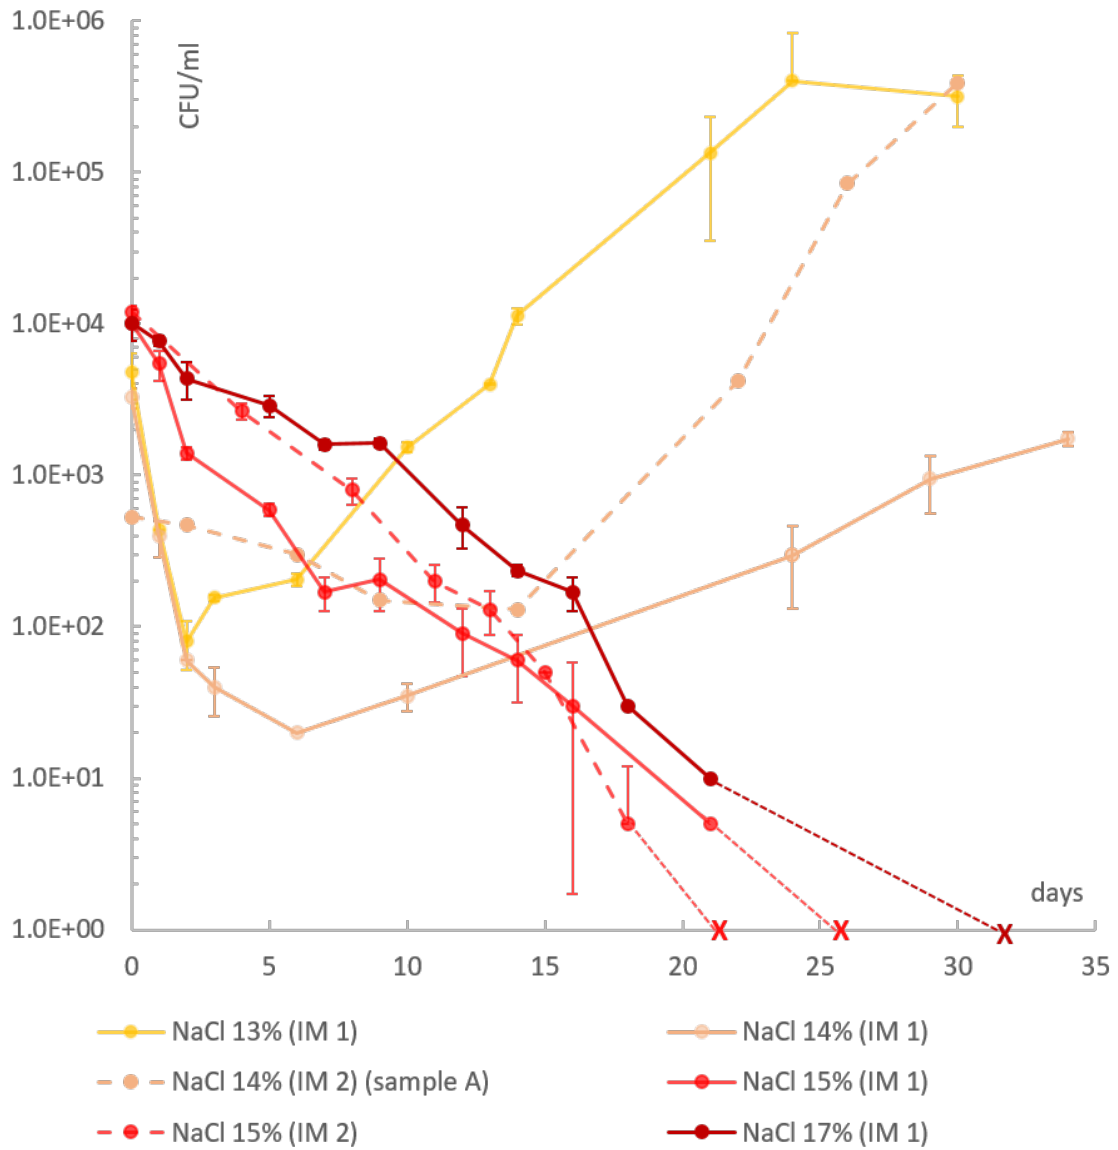

**FIG. S1:** Growth curves in NaCl containing media at 25°C. NaCl 14% (IM 2) (sample B) got contaminated.

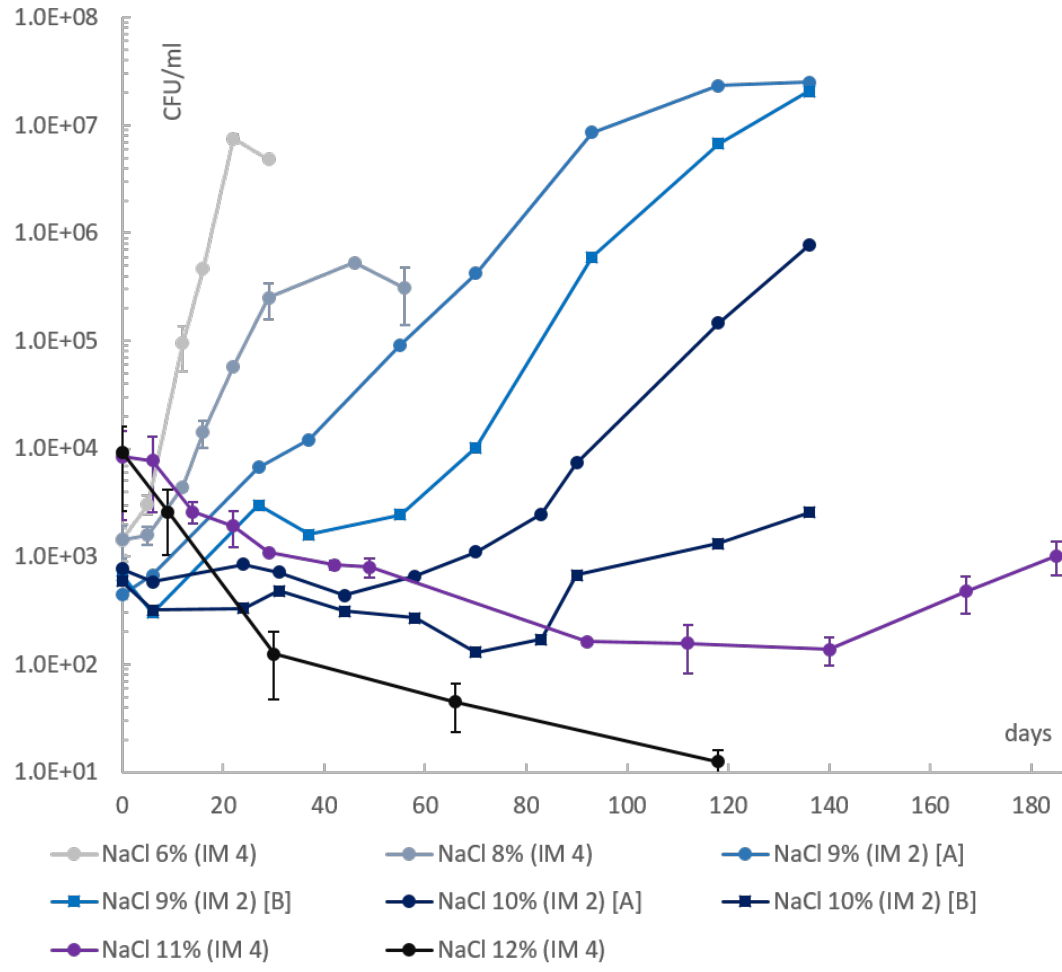

**FIG. S2:** Growth curves in NaCl containing media at 4°C. Biological duplicates A and B were not averaged for 9%- and 10%-samples due to differences in growth. No detectable CFUs in the 12% NaCl sample after 200 days.

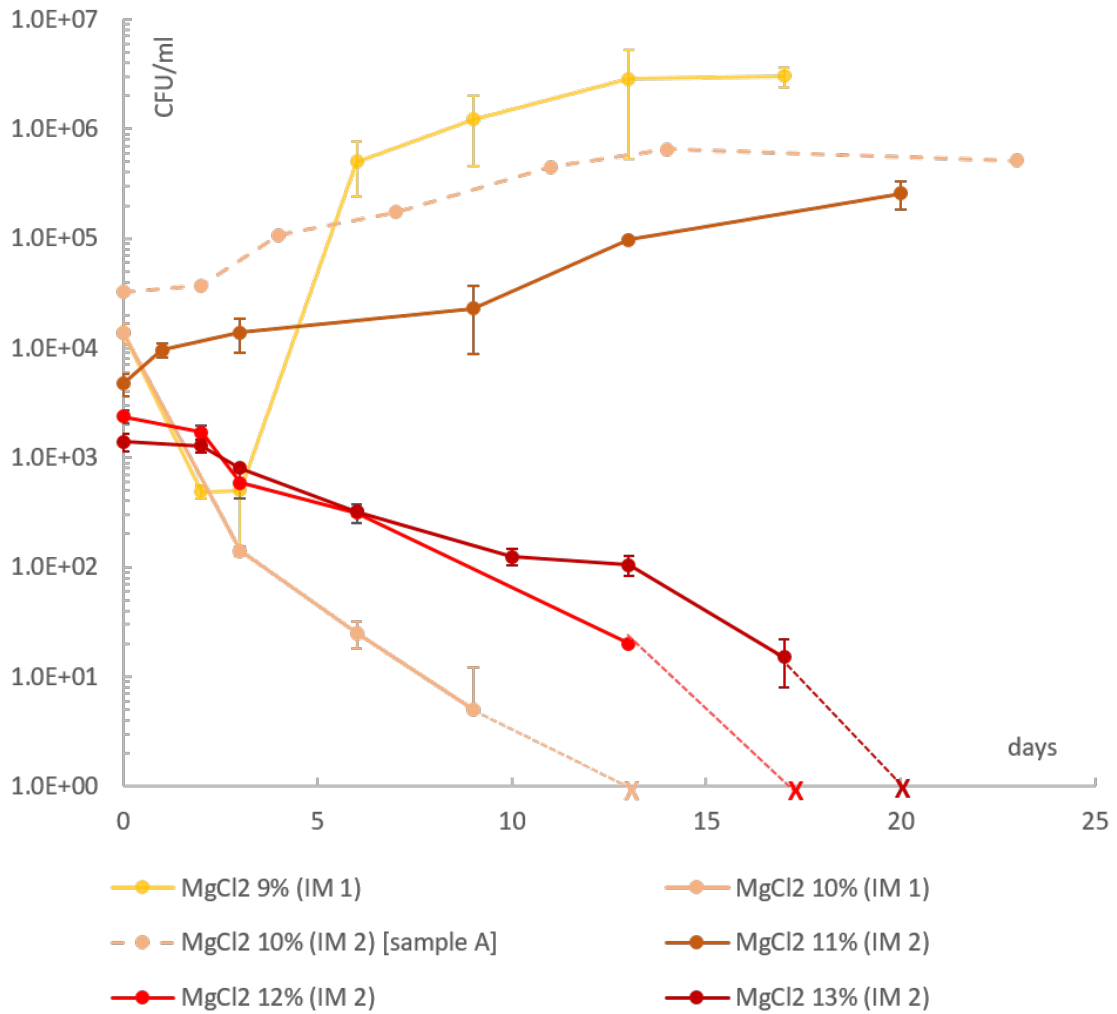

**FIG. S3:** Growth curves in MgCl<sub>2</sub> containing media at 25°C. MgCl<sub>2</sub> 10% (IM 2) (sample B) did not show growth.



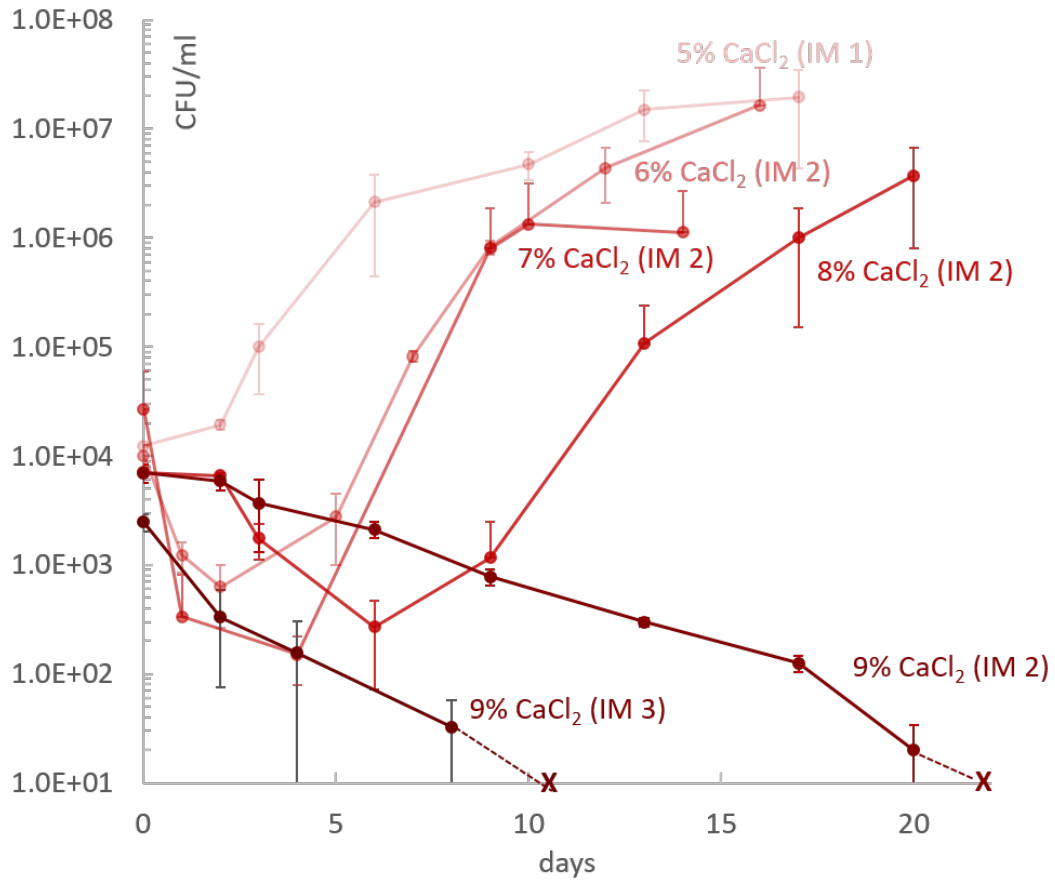

**FIG. S5:** Growth curves in CaCl<sub>2</sub> containing media at 25°C. See also Fig. 1 in the main text.

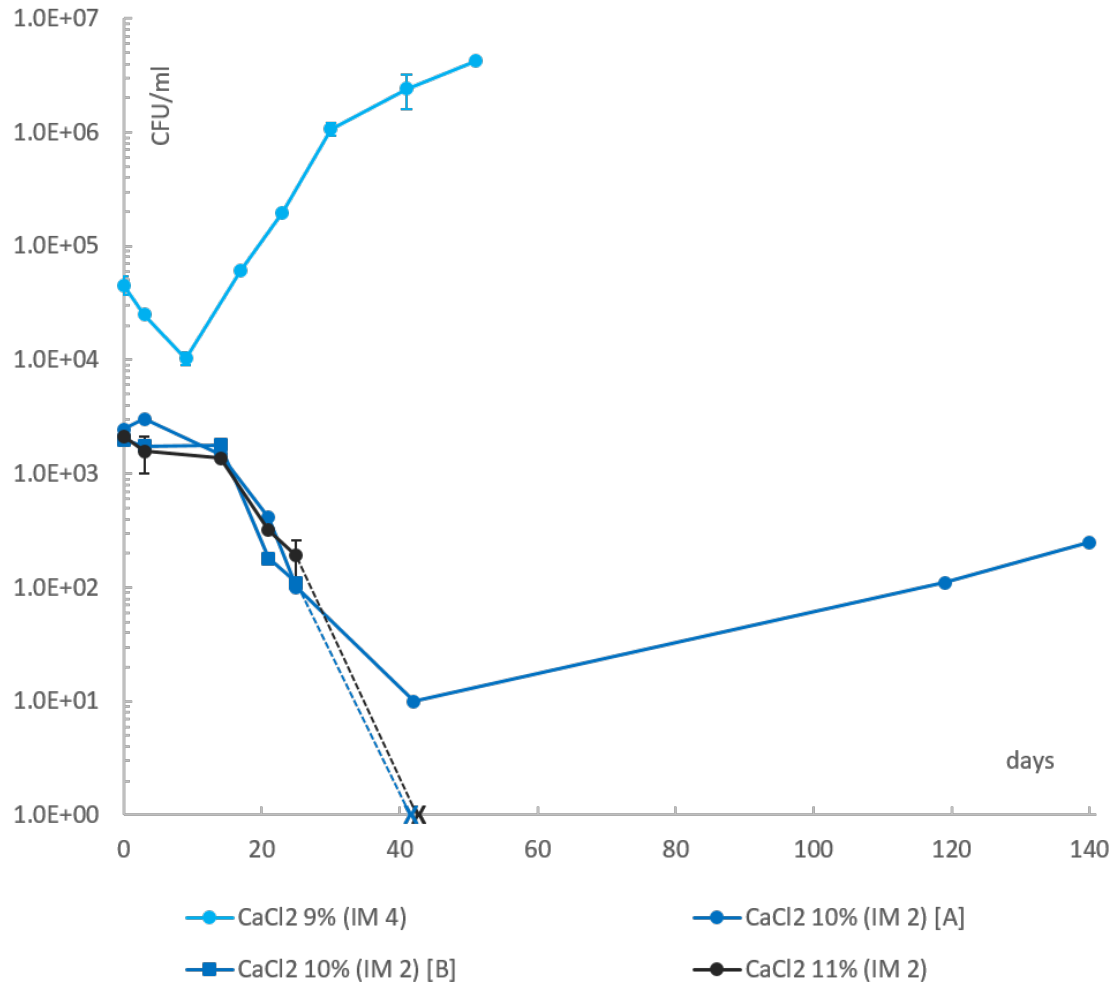

**FIG. S6:** Growth curves in CaCl<sub>2</sub> containing media at 4°C. Biological duplicates A and B were not averaged for 10%-samples due to differences in growth. See also Fig. 1 in the main text.

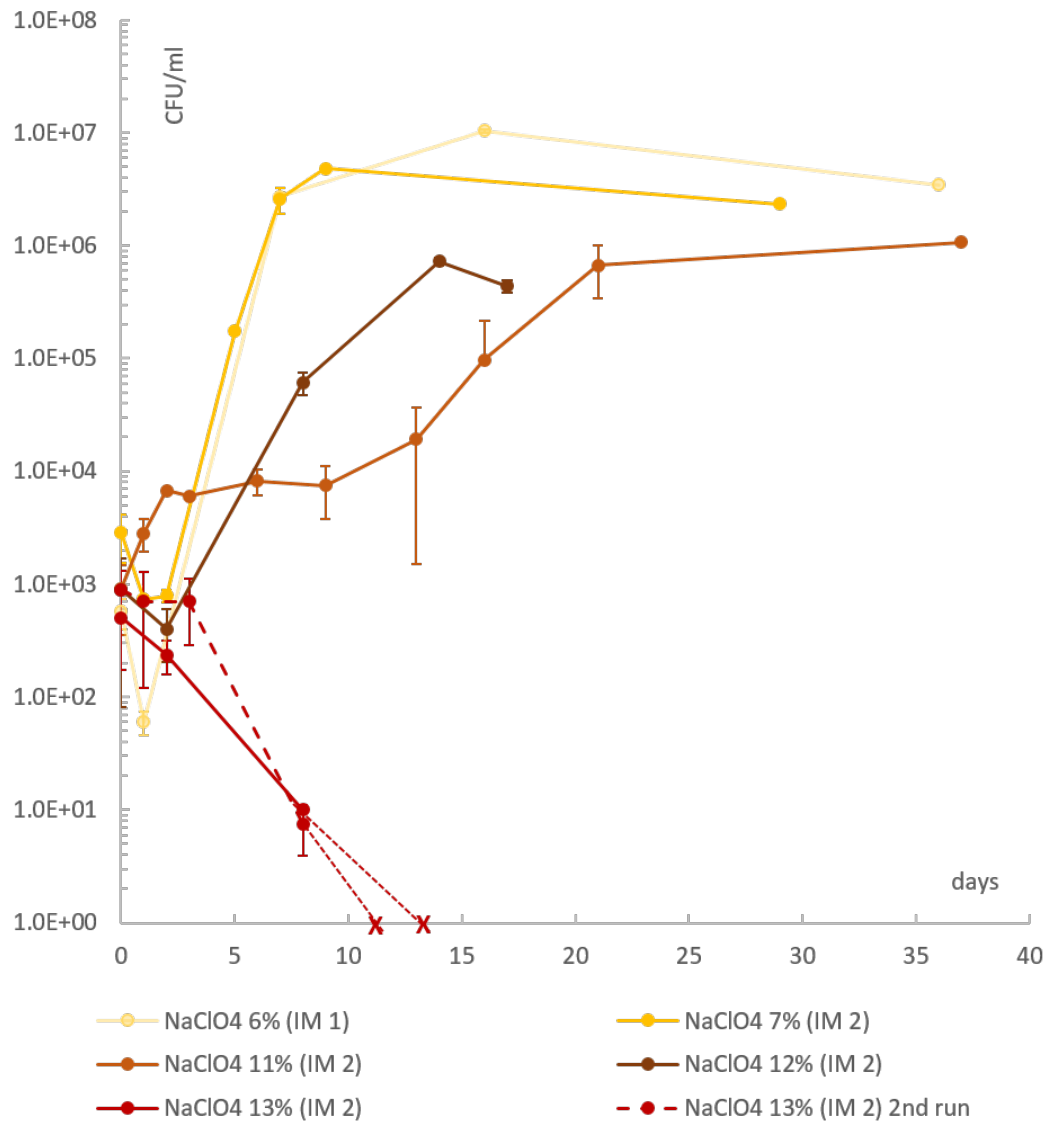

**FIG. S7:** Growth curves in NaClO<sub>4</sub> containing media at 25°C.



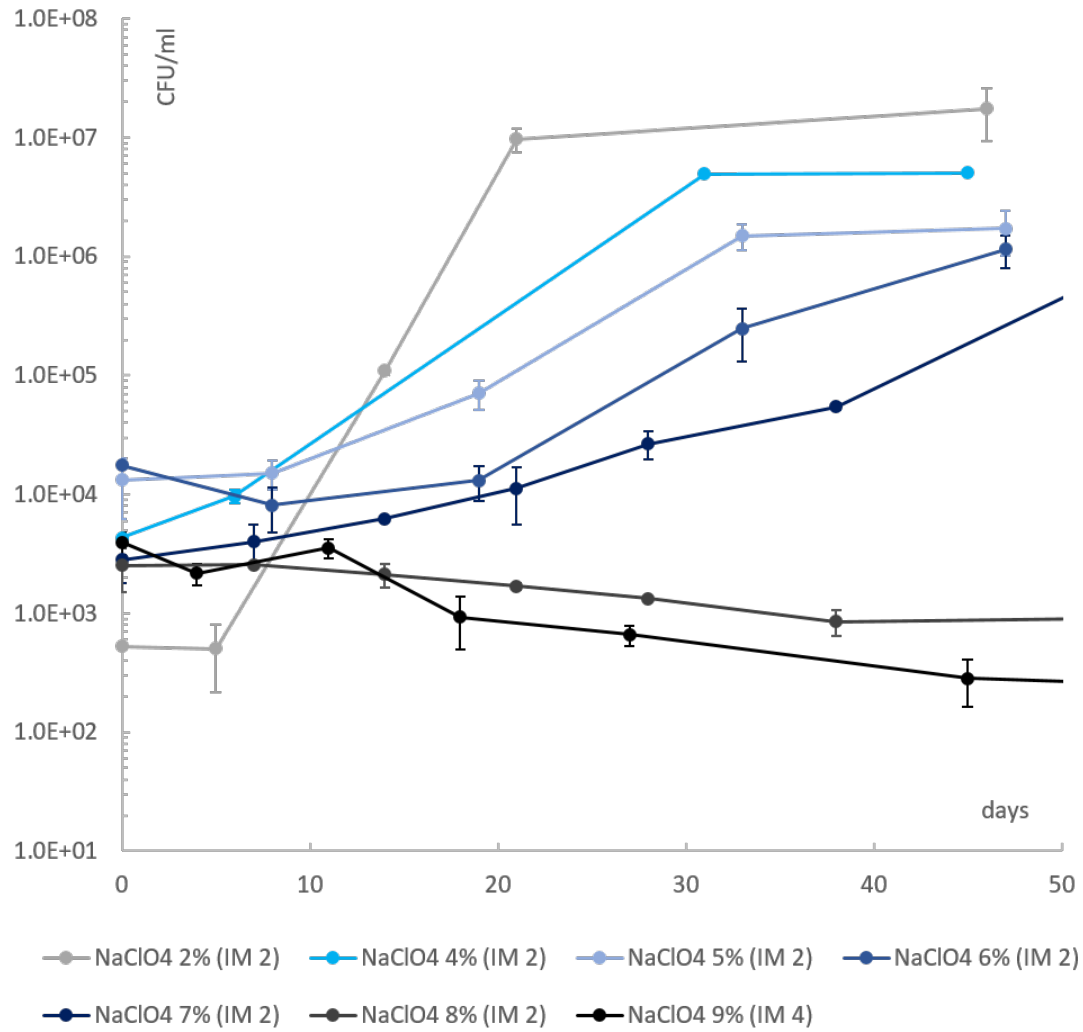

**FIG. S8:** Growth curves in NaClO<sub>4</sub> containing media at 4°C. NaClO<sub>4</sub> 2% (IM 2) was inoculated with culture grown in media with 3 wt% Ca(ClO<sub>4</sub>)<sub>2</sub> at 4°C. No detectable CFUs in NaClO<sub>4</sub> 9% after 207 days.

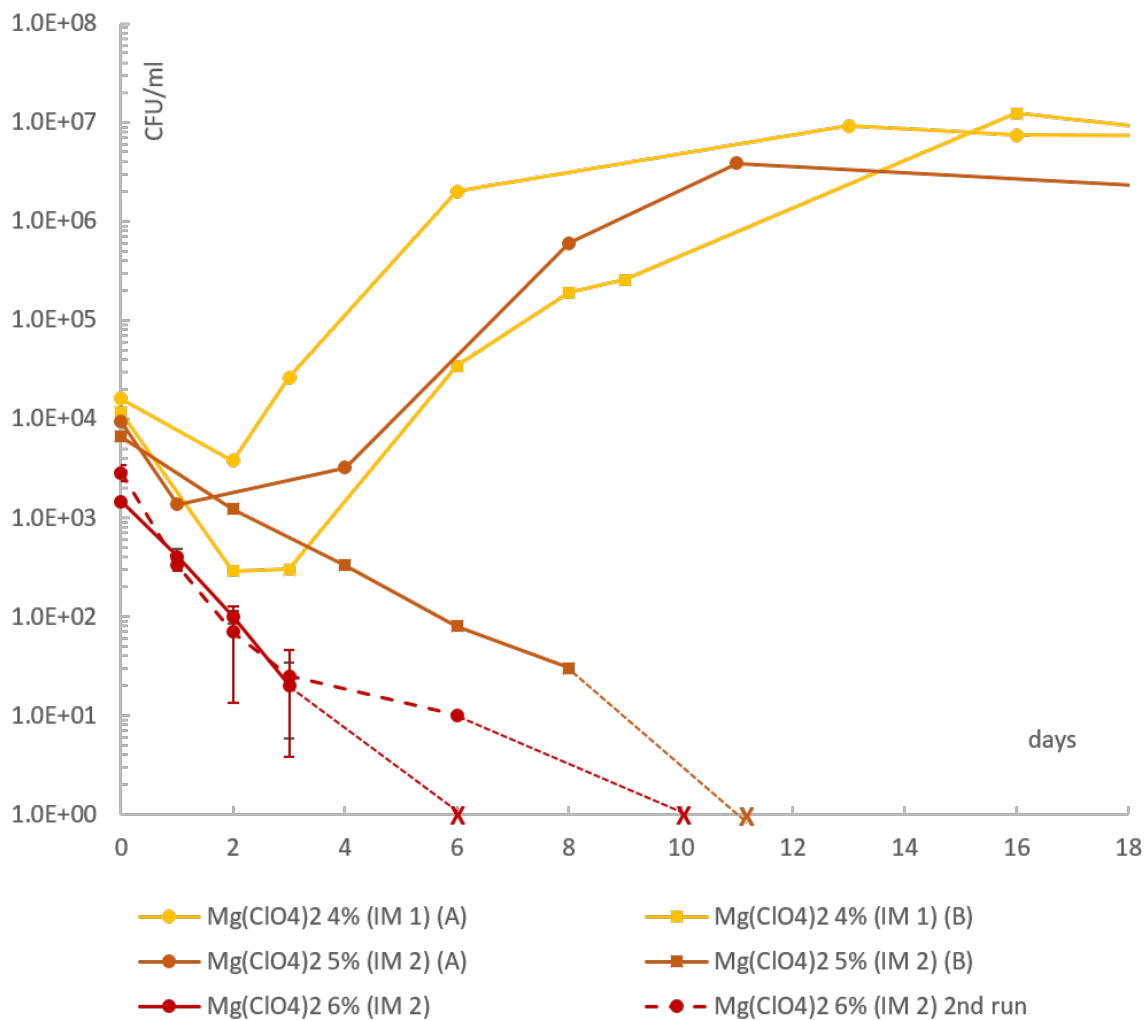

**FIG. S9:** Growth curves in  $Mg(ClO_4)_2$  containing media at 25°C. Biological duplicates A and B were not averaged for 4%- and 5%-samples due differences in growth.

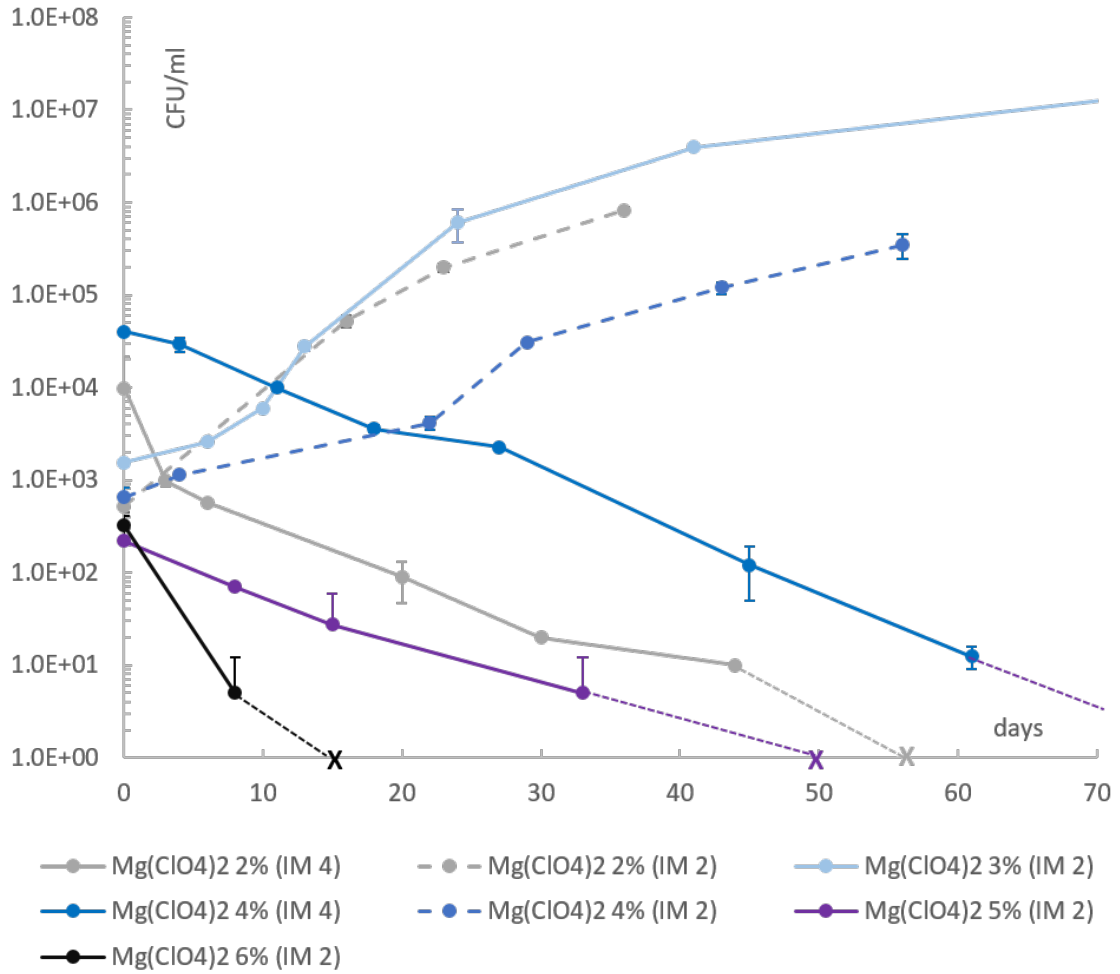

**FIG. S10:** Growth curves in Mg(ClO<sub>4</sub>)<sub>2</sub> containing media at 4°C. Mg(ClO<sub>4</sub>)<sub>2</sub> 2% (IM 2) was inoculated with a culture grown in media with 3 wt% Ca(ClO<sub>4</sub>)<sub>2</sub> at 4°C since inoculation with a culture grown in 5% Mg(ClO<sub>4</sub>)<sub>2</sub> medium at 25°C (IM 4) did not result in growth.

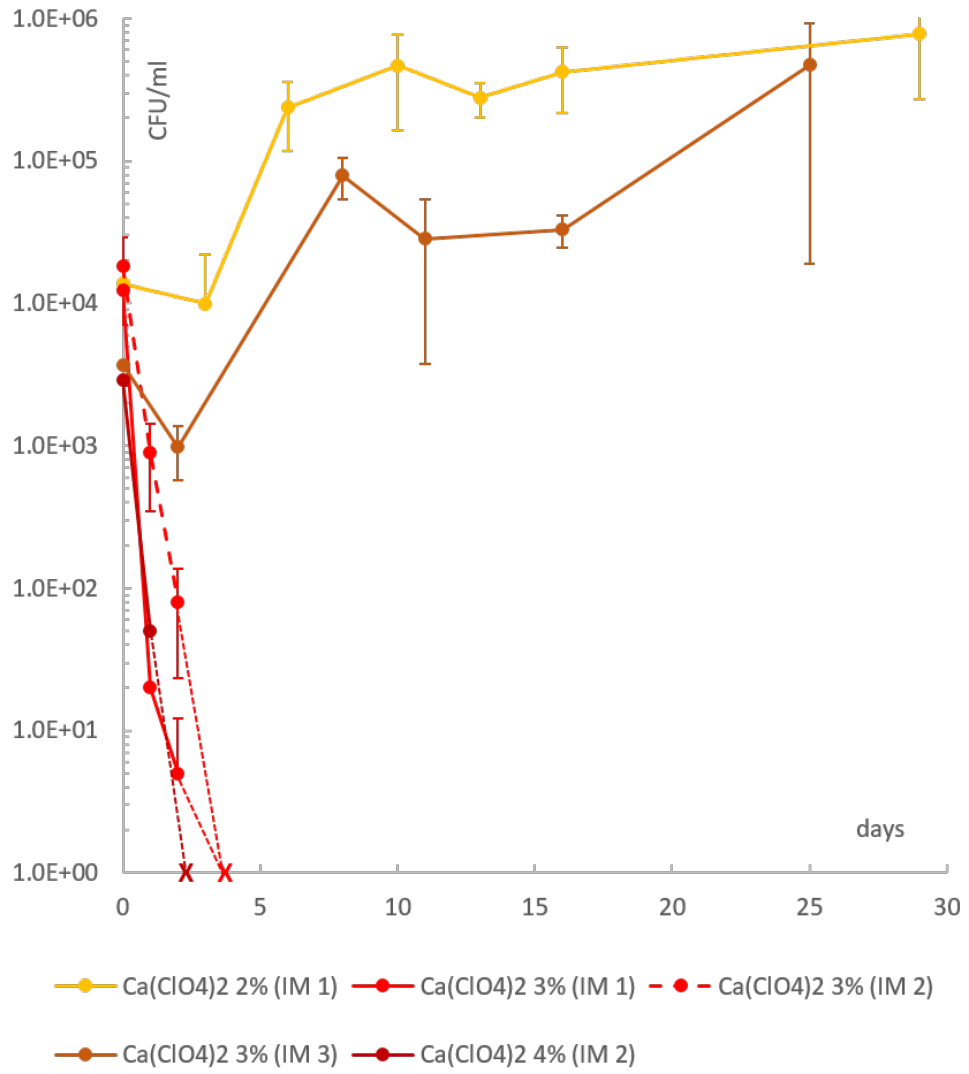

**FIG. S11:** Growth curves in  $\text{Ca}(\text{ClO}_4)_2$  containing media at 25°C.

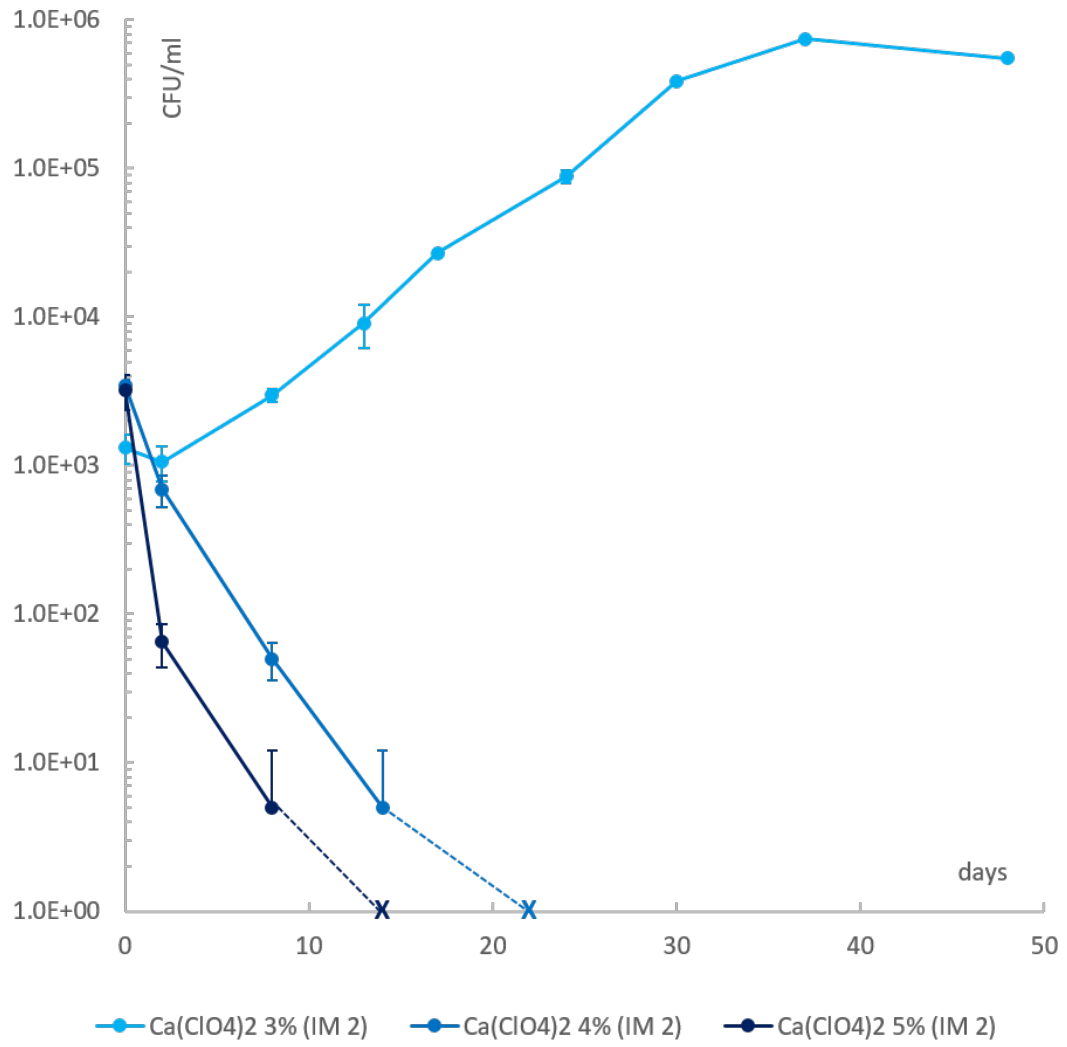

**FIG. S12:** Growth curves in Ca(ClO<sub>4</sub>)<sub>2</sub> containing media at 4°C.

2. Ionic strengths and water activities at the MSCg (additionally to Fig. 2 in the main text)

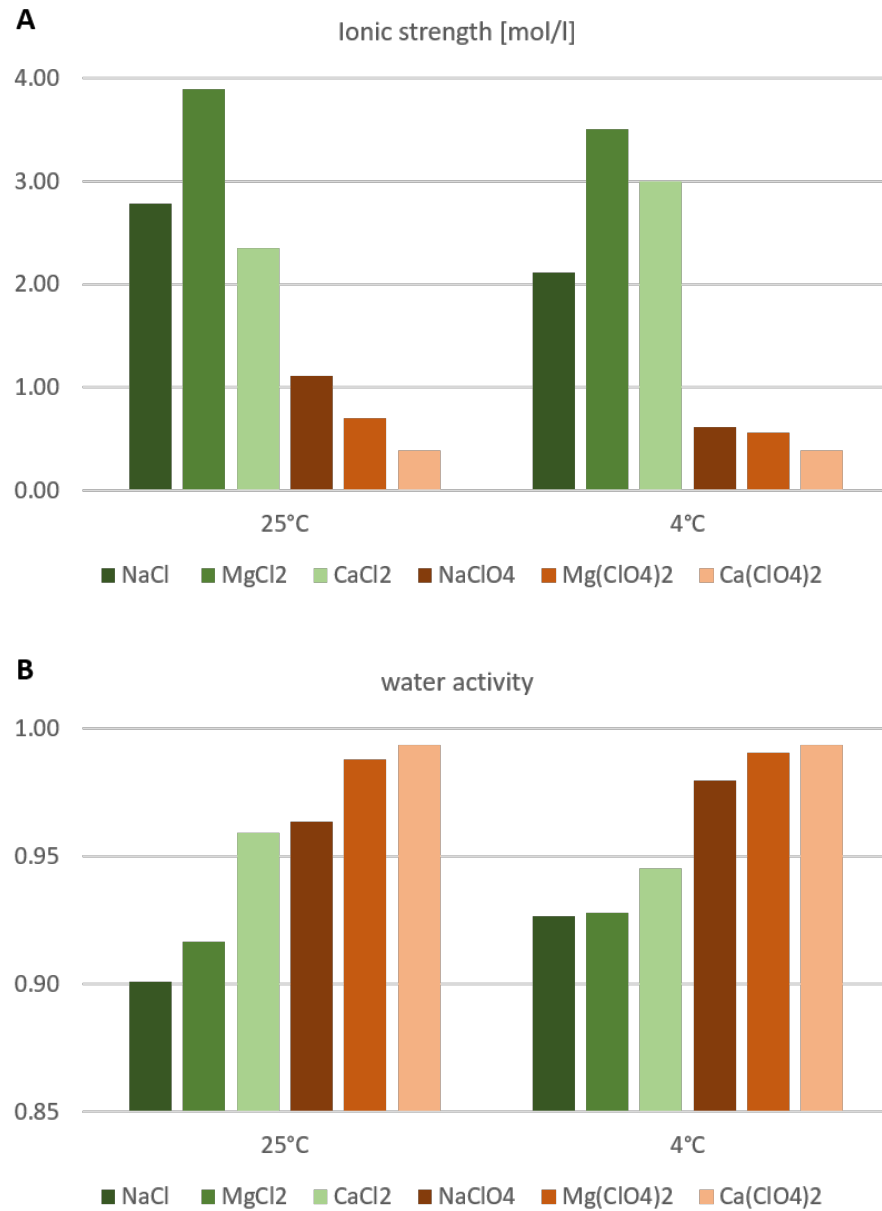

**FIG. S13:** Ionic strengths (**A**) and water activities (**B**) at the MSCg. See also Table 1 and Fig. 2 in the main text.

3. Cell colony morphologies of *P. halocryophilus* grown under salt stress conditions (additionally to Fig. 4 in the main text)

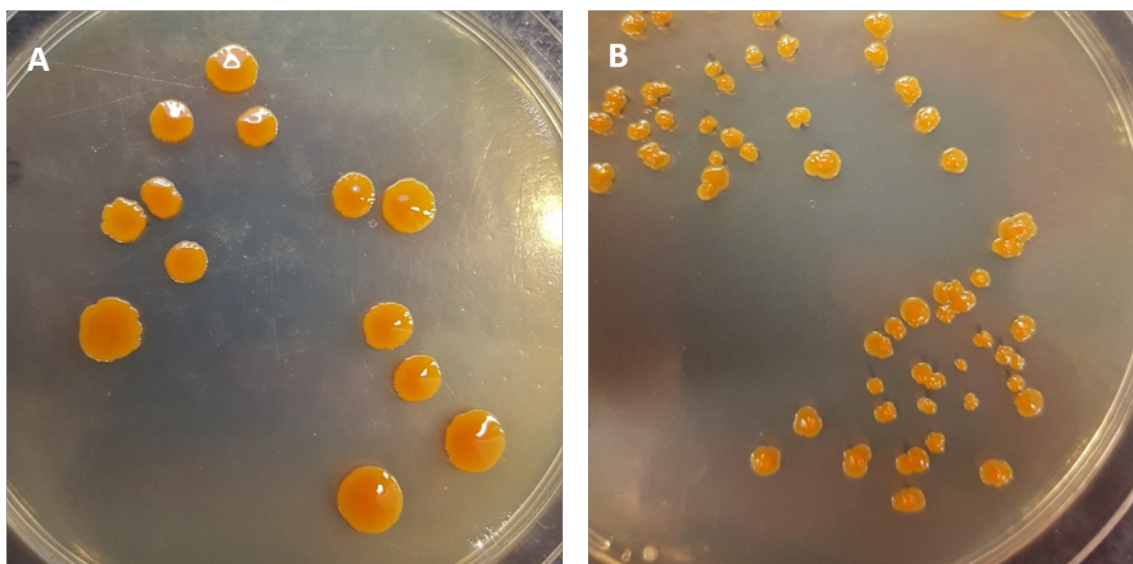

**FIG. S14:** Irregular jagged colonies (type III) of *P. halocryophilus* occurring after bacterial growth in medium containing 9 wt%  $\text{MgCl}_2$  (A) or 4 wt%  $\text{Mg}(\text{ClO}_4)_2$  (B).

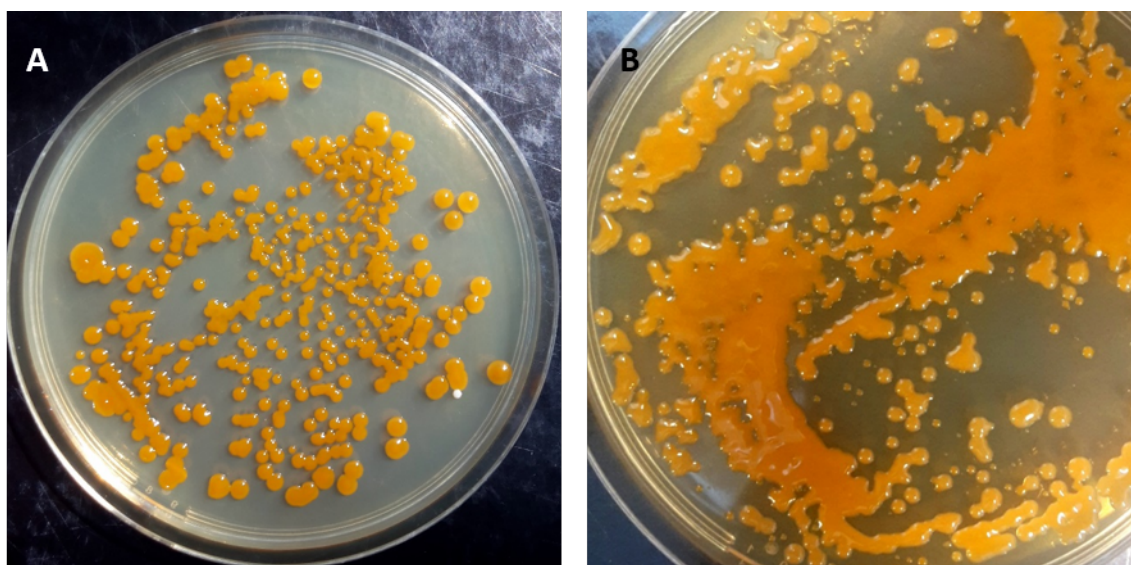

**FIG. S15:** Mucooid and shiny colonies (type IV) that merge easily during colony growth occurring after bacterial growth in medium containing 6 wt%  $\text{CaCl}_2$  (A) or 8 wt%  $\text{CaCl}_2$  (B).

4. Fluorescence microscopy images (additionally to Fig. 5 in the main text)

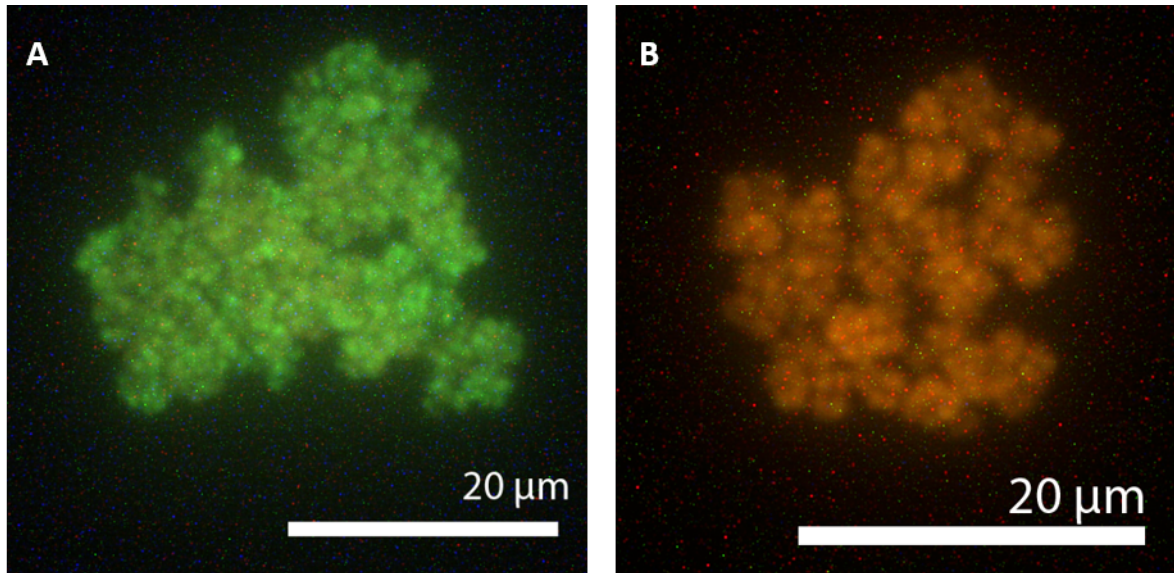

**FIG. S16:** Fluorescence microscopy images (after life/dead staining) of cell clusters of *P. halocryophilus* in 10 wt% NaClO<sub>4</sub> medium before **(A)** and after **(B)** killing all cells within one cluster through ethanol treatment.
